# Supplementary material
Source: PubMed Central journal article supplement (PMC5762134)
Supplement: NIHMS908686-supplement-supplement_1.pdf [file NIHMS908686-supplement-supplement_1.pdf]

Table S1. Correlates of a Panic-Like Experience

| Clinical Correlate          | <i>B</i> | 95% CI       |
|-----------------------------|----------|--------------|
| Panic symptoms              | 1.71 **  | 0.48 – 2.95  |
| GAD symptoms                | 3.01 +   | 1.77 – 4.25  |
| Separation anxiety symptoms | 1.26 *   | 0.13 – 2.40  |
| Social anxiety symptoms     | 0.29     | -0.85 – 1.42 |
| Extraversion                | -0.48    | -1.94 – 0.98 |
| Neuroticism                 | 2.12 **  | 0.51 – 3.74  |
| Anxiety sensitivity         | 3.10 **  | 1.17 – 5.05  |
| Behavioral activation       | 2.81 **  | 0.66 – 4.96  |
| Behavioral inhibition       | 2.24 *** | 0.87 – 3.61  |
| Fearfulness                 | 0.16 **  | 0.05 – 0.27  |
| Irritability                | 1.73 *** | 0.81 – 2.66  |
| Depression symptoms         | 1.41 *   | 0.05 – 2.76  |
| Baseline distress           | 0.94 *** | 0.38 – 1.50  |
|                             | OR       |              |
| Early termination           | 1.63     | 0.55 – 5.19  |

Note. GAD = generalized anxiety disorders.

\*  $p \leq .05$ , \*\*  $p \leq .01$ , \*\*\*  $p \leq .001$ , +  $p \leq .0001$ .

Table S2. Correlates of Participant Sex

| Clinical Correlate          | <i>B</i>          | 95% CI       |
|-----------------------------|-------------------|--------------|
| Panic symptoms              | 1.21 ***          | 0.56 – 1.86  |
| GAD symptoms                | 1.12 ***          | 0.48 – 1.76  |
| Separation anxiety symptoms | 0.89 **           | 0.29 – 1.49  |
| Social anxiety symptoms     | 0.81 **           | 0.22 – 1.39  |
| Extraversion                | 0.29              | -0.47 – 1.06 |
| Neuroticism                 | 1.47 ***          | 0.63 – 2.32  |
| Anxiety sensitivity         | 1.77 ***          | 0.74 – 2.80  |
| Behavioral activation       | -0.32             | -1.40 – 0.75 |
| Behavioral inhibition       | 1.62 <sup>+</sup> | 0.91 – 2.33  |
| Fearfulness                 | 0.14 <sup>+</sup> | 0.08 – 0.20  |
| Irritability                | 0.10              | -0.37 – 0.57 |
| Depression symptoms         | 0.52              | -0.21 – 1.24 |
| Baseline distress           | 0.04              | -0.23 – 0.32 |

  

|                                   | OR   |             |
|-----------------------------------|------|-------------|
| Early termination                 | 1.20 | 0.68 – 2.16 |
| Panic-like experience during task | 1.25 | 0.51 – 3.18 |

Note. Participant sex is coded as 0 (male) and 1 (female). GAD = generalized anxiety disorders.

\*  $p \leq .05$ , \*\*  $p \leq .01$ , \*\*\*  $p \leq .001$ , <sup>+</sup>  $p \leq .0001$ .

Figure 1. Distress over time by class

Figure 2. Bar graph of class means for clinical correlates. Note: GAD = generalized anxiety disorder.

Figure S1. Bar graph of fearfulness by class membership
